# Supplementary material for: Synthesis, characterization and enhanced photocatalytic CO2 reduction activity of graphene supported TiO2 nanocrystals with coexposed {001} and {101} facets
Source: Royal Society of Chemistry journal article supplement (doi:10.1039/c5cp07854g), 2016-01-01
Supplement: c5cp07854g1.pdf [file c5cp07854g1.pdf]

## Supporting information

### **Synthesis, characterization, and enhanced photocatalytic CO<sub>2</sub> reduction activity of graphene supported TiO<sub>2</sub> nanocrystals with coexposed {001} and {101} facets.**

Zhuo Xiong<sup>1</sup>, Ying Luo<sup>1</sup>, Yongchun Zhao<sup>1\*</sup>, Junying Zhang<sup>1\*</sup>, Chuguang Zheng<sup>1</sup>, Jeffrey C. S. Wu<sup>2</sup>

<sup>1</sup>State Key Laboratory of Coal Combustion, Huazhong University of Science & Technology, 1037 Luoyu Road, Wuhan 430074, China

<sup>2</sup> Department of Chemical Engineering, National Taiwan University, Taipei 10617, Taiwan

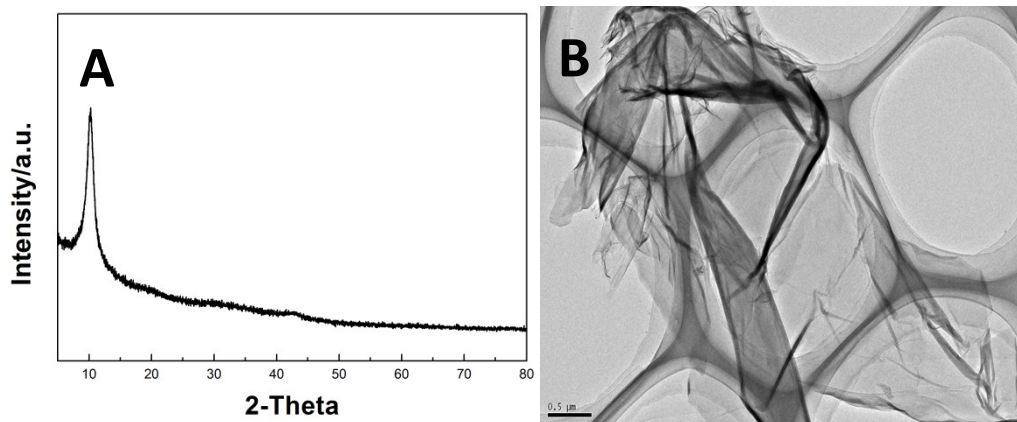

**Figure S1.** XRD pattern (A) and TEM image (B) of GO.

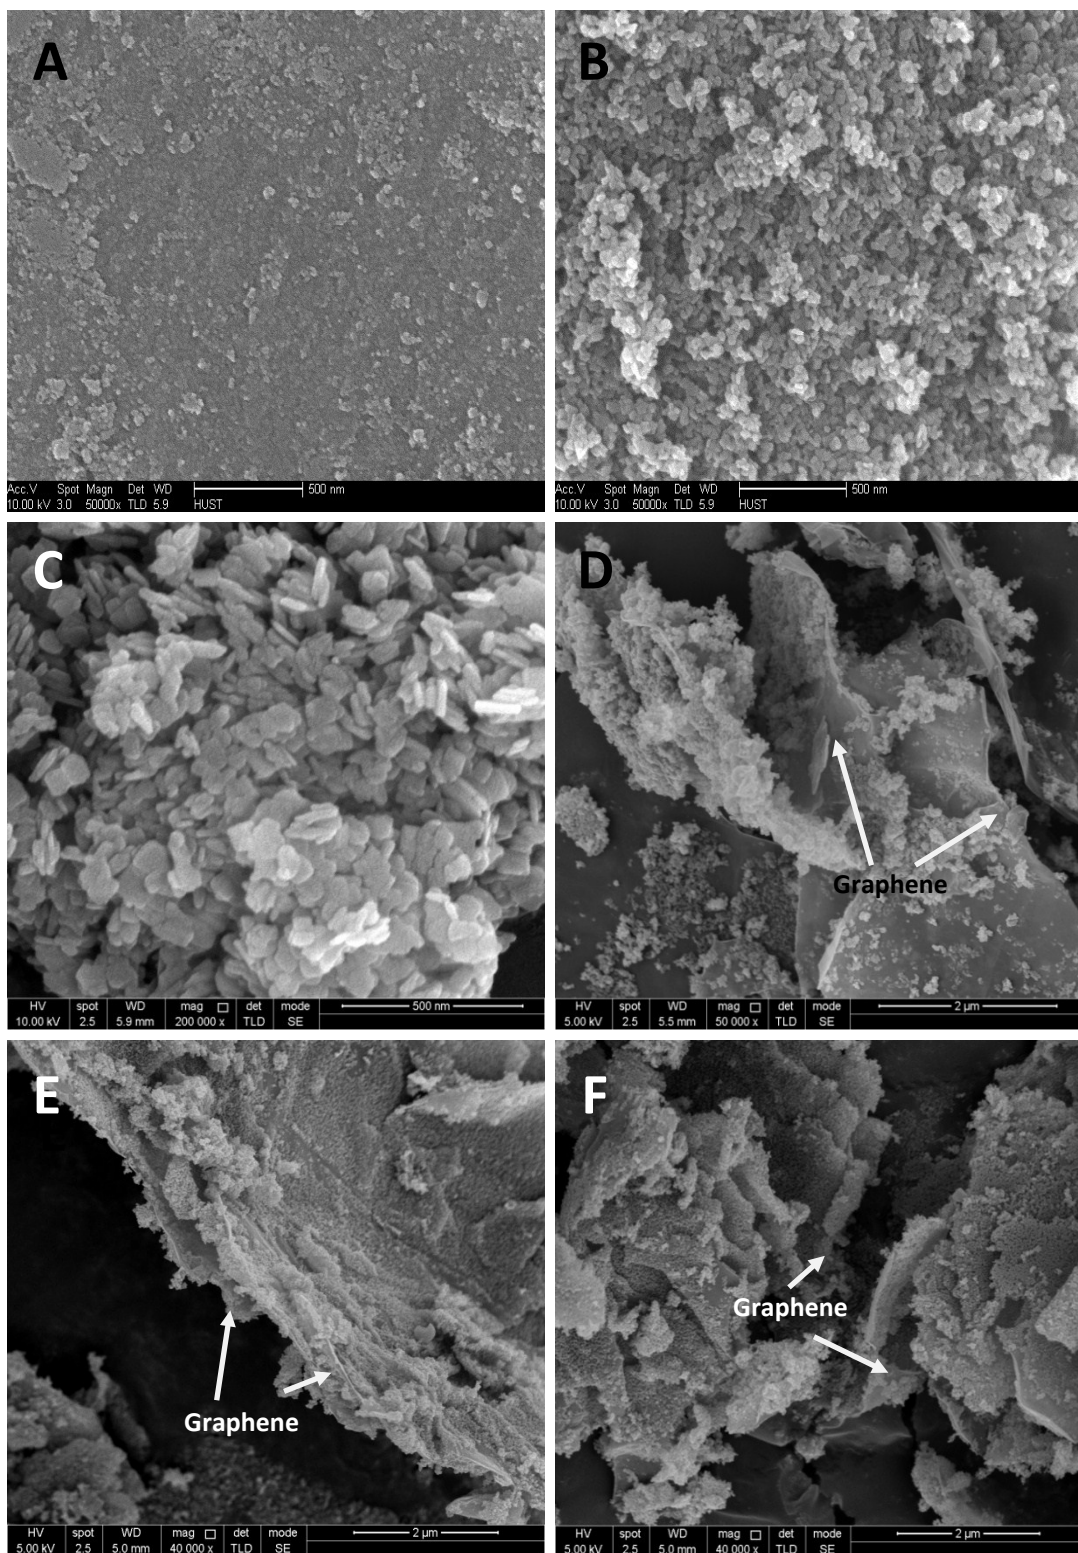

**Figure S2.** FE-SEM images of TiO<sub>2</sub>-101 (A), TiO<sub>2</sub>-001/101 (B), TiO<sub>2</sub>-001 (C), 5%G/TiO<sub>2</sub>-001/101 (D), 10%G/TiO<sub>2</sub>-001/101(E), and 20%G/TiO<sub>2</sub>-001/101 samples (F).
